# Supplementary material for: Cutaneous Involvement in Diseases with Plasma Cell Differentiation: Diagnostic Approach
Source: MDPI journal article supplement (doi:10.3390/curroncol29050246), 2022-04-24
Supplement: s1 [file s1]

**Table S1: Clinic-pathologic features of 4 cases with skin involvement by neoplasms with plasma cell differentiation**

| CASE AGE/SEX<br>DIAGNOSIS    | CLINICAL<br>HISTORY                                                                                                   | FEATURES OF<br>SKIN LESIONS                                  | HISTOLOGY                                                                                      | BM<br>INVOLVEMENT | IHC HC ISH                                                                                    | MOLECULAR<br>FEATURES | THERAPY<br>OUTCOME                                                   |
|------------------------------|-----------------------------------------------------------------------------------------------------------------------|--------------------------------------------------------------|------------------------------------------------------------------------------------------------|-------------------|-----------------------------------------------------------------------------------------------|-----------------------|----------------------------------------------------------------------|
| CASE 1<br>77/F<br>PCMZL      | Skin lesion on breast (20 days history).<br>Previous breast cancer<br>No general symptoms<br>No adenopathy            | Solitary, small, erythematous skin papule on breast          | Non-epidermotropic interstitial/perivascular dermal infiltrate composed of mature plasma cells | negative          | CD138+ Kappa+ lambda- CD20- PAX5- CD56- cyclin D1- IRTA1- IgG4- HHV8- CD3- CD4- CD8- Ki67: 5% | IGH +                 | Rituximab plus chlorambucil (4 cycles);<br>Disease-free at 24 months |
| CASE 2<br>63/M<br>Amyloidoma | Mass of the calf (slowly growing over 10 years);<br>No signs of skeletal muscle infiltration ;<br>No general symptoms | Soft, non-tender, exophytic mass (5 cm) in the calf subcutis | Amorphous, eosinophilic material with sparse plasma cells within dermis and subcutis           | negative          | Amorphous material: Congo Red+<br><br>Plasma cells: CD138+ lambda + Kappa-                    | NP                    | Surgical excision only;<br>Disease-free at 56 months                 |

|                            |                                                                                                                                           |                                                                                          |                                                                                                            |                        |                                                                                                                                   |    |                                                                         |
|----------------------------|-------------------------------------------------------------------------------------------------------------------------------------------|------------------------------------------------------------------------------------------|------------------------------------------------------------------------------------------------------------|------------------------|-----------------------------------------------------------------------------------------------------------------------------------|----|-------------------------------------------------------------------------|
| CASE 3<br>75/M<br>Skin MM  | 5-year history of pluri-treated MM;<br>Skin lesion developed under the third line of MM therapy                                           | Solitary, violaceous skin nodule in the supraclavicular fossa at site of a surgical scar | Dense infiltrate of large-sized atypical cells within dermis and subcutis with no epidermotropism          | MM                     | CD138+ MUM18+ MUM1+ CD56+ CD79 alpha+/- kappa+ lambda- CD20- CD3- HHV8- EBER- Ki67: 90%                                           | NP | Melphalan plus second Auto-HSCT;<br>Good control of disease at 6 months |
| CASE 4<br>40/M<br>Skin PBL | HIV positivity; PBL diagnosed 8 months before (abdominal mass); Frequent infections; Skin lesion developed 2 weeks after modified COMP CT | Solitary, firm, rapidly growing, violaceous skin nodule (3 cm) in the flank              | Dense infiltrate of large-sized atypical cells within superficial and deep dermis, with no epidermotropism | NP at time of skin PBL | CD138+ MUM1+ MUM18+ CD56+ kappa+ lambda- CD45+/- CD30+/- CD20- CD79 alpha- PAX5- CD3- CD5- EMA- ALK1- CD10- HHV8- EBER+ Ki67: 90% | NP | No further treatment;<br>Exitus shortly after diagnosis of Skin PBL     |

**LEGENDS:** auto-HSCT: autologous hematopoietic stem cell transplantation; BM: bone marrow; CT: chemotherapy; modified COMP: liposomal doxorubicin plus cyclophosphamide; EBER: Epstein Barr virus encoded RNA; HC: histochemistry; IGH: immunoglobulin heavy chain; IIC: immunohistochemistry; ISH: in situ hybridization; MM: multiple myeloma; NP: not performed; PBL: plasmablastic lymphoma; PCMZL: primary cutaneous marginal zone lymphoma
